# Supplementary material for: Pseudotrichonympha leei, Pseudotrichonympha lifesoni, and Pseudotrichonympha pearti, new species of parabasalian flagellates and the description of a rotating subcellular structure
Source: PubMed Central journal article supplement (PMC5703945; doi:10.1038/s41598-017-16259-8), 2017-11-27
Supplement: 41598_2017_16259_MOESM1_ESM.pdf [file 41598_2017_16259_MOESM1_ESM.pdf]

***Pseudotrichonympha leei, Pseudotrichonympha lifesoni, and Pseudotrichonympha pearti, new species of parabasalian flagellates and the description of a rotating subcellular structure.***

Javier del Campo<sup>1,2</sup>, Erick R. James<sup>1</sup>, Yoshihisa Hirakawa<sup>1</sup>, Rebecca Fiorito<sup>1</sup>, Martin Kolisko<sup>1,3</sup>, Nicholas A. T. Irwin<sup>1</sup>, Varsha Mathur<sup>1</sup>, Vittorio Boscaro<sup>1</sup>, Elisabeth Hehenberger<sup>1</sup>, Anna Karnkowska<sup>1,4</sup>, Rudolf H. Scheffrahn<sup>5</sup>, Patrick J. Keeling<sup>1,\*</sup>

<sup>1</sup> Department of Botany, University of British Columbia, Vancouver, British Columbia, Canada

<sup>2</sup> Department of Marine Biology and Oceanography, Institut de Ciències del Mar - CSIC, Barcelona, Catalonia, Spain

<sup>3</sup> Institute of Parasitology, Biology Centre, Czech Academy of Sciences, České Budějovice, Czech Republic

<sup>4</sup> Department of Molecular Phylogenetics and Evolution, Faculty of Biology and Biological and Chemical Research Centre, University of Warsaw, Warsaw, Poland

<sup>5</sup> Fort Lauderdale Research & Education Center, University of Florida, Davie, Florida, USA

\*Corresponding author; pkeeling@mail.ubc.ca

## Supplementary Figure Legends

**Supplementary Figure 1.** Barcode identification of termite hosts based on maximum likelihood phylogeny of mitochondrial 16S (LSU) rRNA. The tree is rooted with the closest known relatives to lower termites, *Cryptocercus punctulatus*. Numbers at nodes correspond to ML bootstrap support over 50% (nodes with lower support are not shown for clarity), and the scale bar represents a distance of 0.06 substitutions per site. Taxon names include GenBank accession numbers and the termite names. Sequences highlighted are *Coptotermes gestroi* and *Coptotermes cf. acinaciformis*, that were obtained in this study.

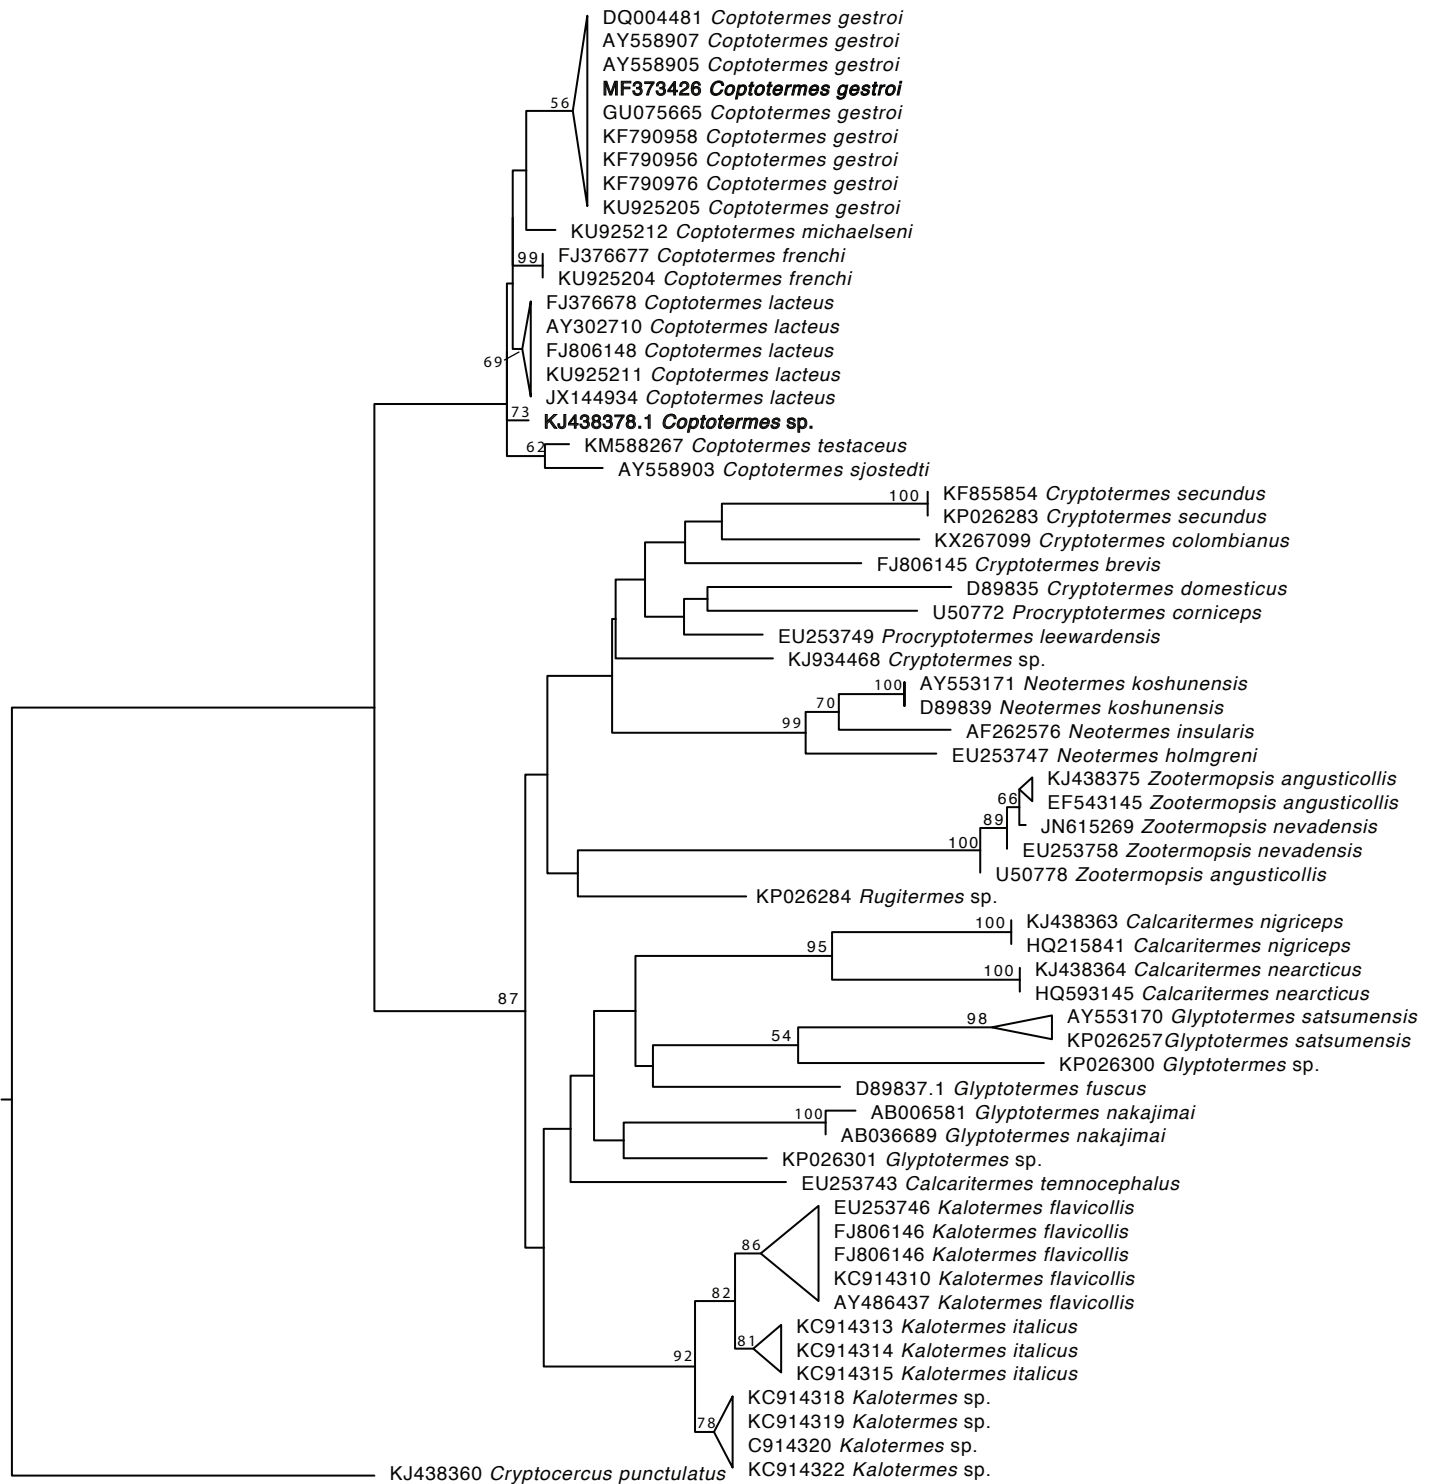

0.06
